# Supplementary material for: A MOF derived bifunctional electrocatalyst Ni3ZnC0.7-Mo2C with enhanced performance for overall water splitting
Source: Royal Society of Chemistry journal article supplement (doi:10.1039/d2dt00673a), 2022-01-01
Supplement: d2dt00673a1.pdf [file d2dt00673a1.pdf]

## Electronic Supplementary Information

### **MOF derived bi-functional Electro-catalyst Ni<sub>3</sub>ZnC<sub>0.7</sub>-Mo<sub>2</sub>C with enhanced performance for Overall Water Splitting**

*Chenfeng Wang*<sup>1,2</sup>, *Zengyao Wang*<sup>1,2</sup>, *Zhiqiang Yao*<sup>1,2</sup>, *Huixiang Liu*<sup>1</sup>, *Liyuan Pei*<sup>1,2</sup>,  
*Xuanyang Li*<sup>1,2</sup>, *Melchizedek Lord Kwesi Essandoh*<sup>3</sup>, *Pei Dong*<sup>4</sup>, *Mingxin Ye*<sup>1\*</sup>,  
*Jianfeng Shen*<sup>1\*</sup>

<sup>1</sup> Institute of Special Materials and Technology, Fudan University, Shanghai 200433, China

<sup>2</sup> Department of Chemistry, Fudan University, Shanghai, 200433, P. R. China

<sup>3</sup> Department of Mechanical Engineering, Howard University, Washington, D.C. 20059, USA

<sup>4</sup> Department of Mechanical Engineering, George Mason University, VA 22030, USA

E-mail: [mxye@fudan.edu.cn](mailto:mxye@fudan.edu.cn), [jfshen@fudan.edu.cn](mailto:jfshen@fudan.edu.cn)

---

## Experiment Section

### 1. Medicines and materials

Zinc nitrate Hexahydrate ( $\text{Zn}(\text{NO}_3)_2 \cdot 6\text{H}_2\text{O}$ ), Sodium Molybdat Dihydrat ( $\text{NaMoO}_4 \cdot 2\text{H}_2\text{O}$ ), Ammonium fluoride ( $\text{NH}_4\text{F}$ ), Urea ( $\text{CON}_2\text{H}_4$ ), 2-Methylimidazole ( $\text{C}_4\text{H}_6\text{N}_2$ ), and Potassium hydroxide ( $\text{KOH}$ ) were purchased from Sinopharm Chemical Reagent Co., Ltd. All chemicals were used as received, without further purification. All the water used in the experiments was purified using a microporous system.

### 2. Samples preparation

#### 2.1 The synthesis of $\text{ZnMoO}_4 \cdot x\text{H}_2\text{O}$ on Ni foam ( $\text{ZnMoO}_4 \cdot x\text{H}_2\text{O}/\text{NF}$ )

Firstly, 0.15 mmol  $\text{NaMoO}_4 \cdot 2\text{H}_2\text{O}$  was dissolved in 25 mL solvent ( $\text{H}_2\text{O}$ : ethanol=2:1), then 6 mmol  $\text{NH}_4\text{F}$  and 7.5 mmol  $\text{NH}_4\text{F}$  were added, recorded as the solution A. 0.15 mmol  $\text{Zn}(\text{NO}_3)_2 \cdot 6\text{H}_2\text{O}$  was dissolved in 20 mL solvent ( $\text{H}_2\text{O}$ : ethanol=2:1), recorded as solution B. Solution B was dropped slowly into solution A and stirred. Ultrasonic treatment was then performed for 1 hour and a milky suspension was obtained. Secondly, the Ni foam (NF) 1.0 mm was cut into 2cm \* 3 cm pieces and then treated ultrasonically for 15 minutes inside 3M HCl to remove the surface oxides, cleaned by ethanol and water. Thirdly, one piece Ni foam was put into 50 mL polytetrafluoroethylene reactor, and the solution mixed in step 1 was added into the reactor, reacting at 160 °C for 12 hours at the blast drying oven. After the reaction, the products were cleaned using ethanol and water, and dried at 60 °C for 12 hours. Finally, the  $\text{ZnMoO}_4 \cdot x\text{H}_2\text{O}$  grown on Ni foam ( $\text{ZnMoO}_4 \cdot x\text{H}_2\text{O}/\text{NF}$ ) was obtained.

#### 2.2 The synthesis $\text{ZnMoO}_4$ -MOF(ZIF-8)/NF

A sealed quartz tank was used to perform Sublimation gas phase MOF reaction. To start with, 50 mg 2-Methylimidazole (2-MeIm) was spread on the bottom of quartz tank, the  $\text{ZnMoO}_4 \cdot x\text{H}_2\text{O}/\text{NF}$  was cut into 1.8 cm \* 0.7 cm pieces and put on the slot. The reaction was conducted at 200 °C for 2 hours, then  $\text{ZnMoO}_4$ -MOF (ZIF-8)-50@NF was obtained. Besides, 20 mg and 80 mg 2-MeIm were used to prepare  $\text{ZnMoO}_4$ -MOF(ZIF-8)-20, 80/NF.

---

### 2.3 The synthesis Ni<sub>3</sub>ZnC<sub>0.7</sub>-Mo<sub>2</sub>C/NF

The ZnMoO<sub>4</sub>-MOF-50/NF was put into a tube furnace, then it was heated to 600 °C at 10 °C/min and kept for 4 hours under the Ar atmosphere. After cooling down to 25 °C, the product, Ni<sub>3</sub>ZnC<sub>0.7</sub>-Mo<sub>2</sub>C-T600/NF, was obtained, loading amount about 2.6 mg cm<sup>-2</sup>.

Besides, 700 °C-4h were used to Ni<sub>3</sub>ZnC<sub>0.7</sub>-Mo<sub>2</sub>C-T700/NF, then the products of 800 °C were pure Mo<sub>2</sub>C because Zn atoms evaporate too fast and Ni<sub>3</sub>ZnC<sub>0.7</sub> can hardly generated.

### 2.4 Synthesis of Pure Ni<sub>3</sub>ZnC<sub>0.7</sub>

Pure Ni<sub>3</sub>ZnC<sub>0.7</sub> was prepared by NiZn-MOF annealing at 600°C-4h. NiZn-MOF was synthesized according to previous literature<sup>20</sup>. Typically, 1.0 mmol of Zn(NO<sub>3</sub>)<sub>2</sub>, 3mmol of Ni(NO<sub>3</sub>)<sub>2</sub> and 2 mmol of triethylenediamine dissolved in 50 mL DMF, and 4.2 mmol of 1,4-benzenedicarboxylic acid was dropped to the DMF solution, then transferred to 100 mL Teflon-lined autoclave, kept for 110°C-48h. After reaction, NiZn-MOF was got by centrifugation and being washed with DMF/ethanol.

Working electrode was prepared as follows: 10 mg of catalyst was dispersed in 1 mL of Isopropyl-alcohol solvent containing 10 μL of 5 wt% Nafion solutions with ultrasonic mixing for about 30 min. Then 400 μL of the catalyst ink suspension was loaded onto Ni foam and dried in air (loading ~2.4 mg cm<sup>-2</sup>).

## 3. Characterization

Transmission electron microscopy (TEM) and elements mapping were obtained through a JEM 2010 microscope at 200 kV. Samples were prepared by ultrasonic dispersion in ethanol and loaded on copper grids with a carbon film. The scanning electron microscope (SEM, Hitachi SU8010) was taken to inspect the samples' morphology. X-ray diffraction (XRD) patterns were conducted on an X-ray diffractometer (bruker-D8) using Cu K $\alpha$  radiation( $\lambda=1.5418 \text{ \AA}$ ). Raman spectrum was conducted on a Micro Raman spectrometer (Reinshaw Raman Scope RM3000). X-ray photoelectron spectrometry (XPS, Kratos Axis Ultra DLD) was used to detect the chemical composition of the samples, then the binding energy was calibrated based on

---

C 1s peak at 284.8eV. Fourier transform infrared (FT-IR) spectra were obtained using a Thermo Nicolet AVATAR 370 FT-IR, the samples were revealed from Ni foam and mixed with KBr and then pressed into a disk. Afterward, the samples were revealed from Ni foam and a Thermogravimetric analysis (TGA) was conducted on a Netzsch STA 449F3 DTA-TGA Jupiter analyzer from 100 °C to 900 °C, at a rate of 10 °C /min.

#### **4 Electrochemical measurements**

Electrochemical measurements were carried out in 1M KOH with a three-electrode cell (CHI 660B, CHI Instruments, Inc., Shanghai). The Ni<sub>3</sub>ZnC<sub>0.7</sub>@NF samples were cut into 0.5 cm \* 0.5 cm. Hg/HgCl<sub>2</sub> and carbon rods were used as the reference electrode, counter electrode, and working electrode. The polarization curves were obtained with a scanning rate of 5 mV s<sup>-1</sup>, with an electrode rotation to avoid the accumulation of H<sub>2</sub> or O<sub>2</sub> bubbles on the electrode surface. Electrochemical impedance spectroscopy (EIS) was performed at the Electrochemical workstation (PGSTAT302N) at an overpotential of 200 mV while sweeping the frequency from 10 kHz to 0.1 Hz. The electrochemical capacitance of the acquired samples was tested in 1 M KOH using cyclic voltammetry at different scan rates in the non-faradaic potential region. The capacitive current was obtained at the middle potential value for scan rate 10 mV s<sup>-1</sup>, 20 mV s<sup>-1</sup>, 30 mV s<sup>-1</sup>, 40 mV s<sup>-1</sup>, and 50 mV s<sup>-1</sup>. The electrode stability was tested by chronoamperometry. The potentials reported in this paper were converted from vs. Hg/HgCl<sub>2</sub> to vs. RHE by  $E(\text{RHE}) = E(\text{SCE}) + 0.241 \text{ V} + 0.059 \text{ pH}$ .

## Experiments details

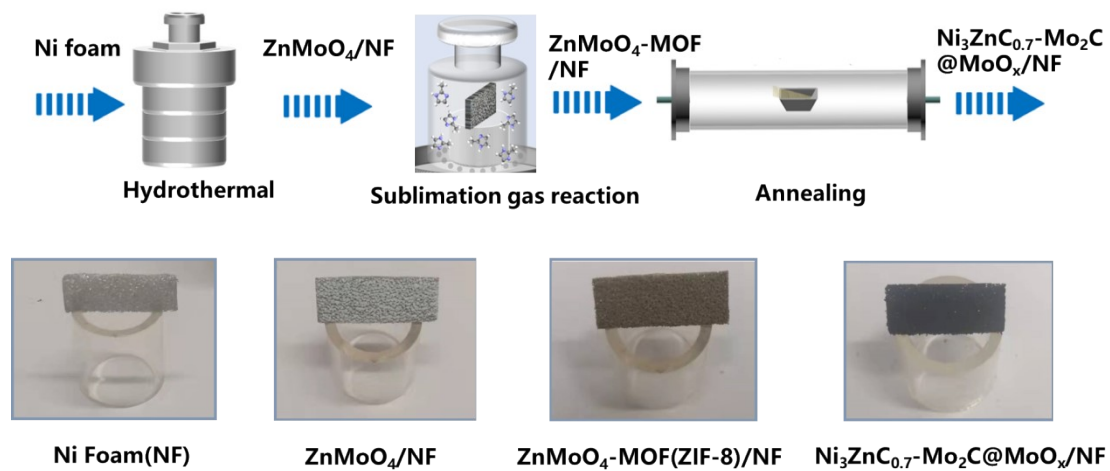

**Figure S1.** The detailed experiment parameters and the photos of the samples.

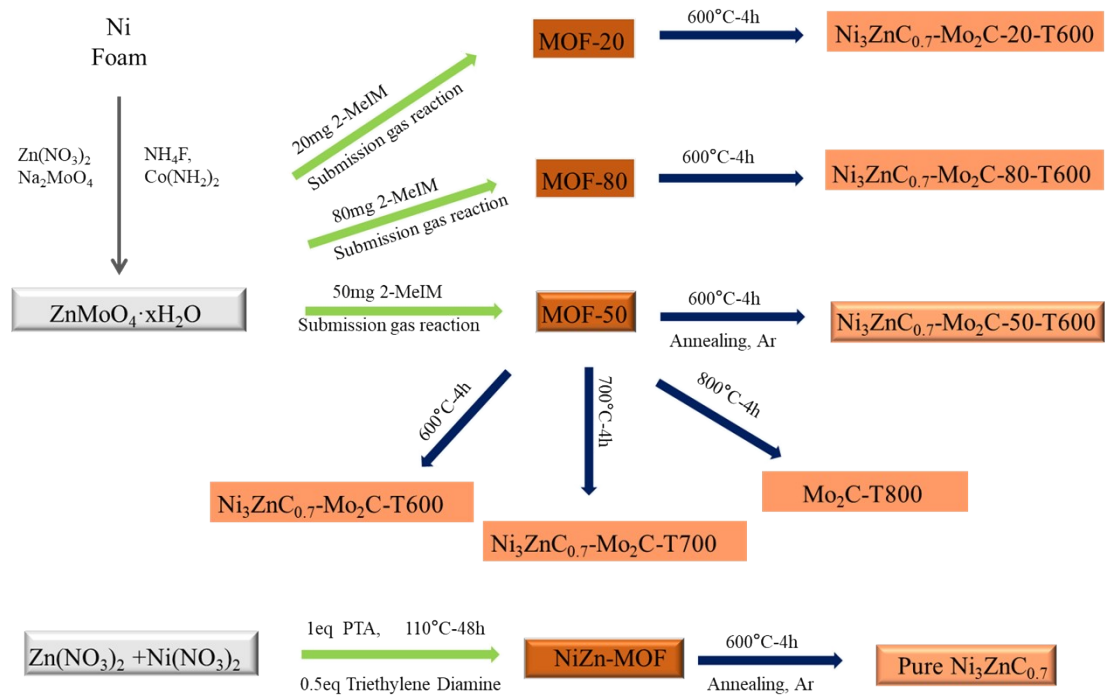

**Figure S2.** Conditions of different samples.

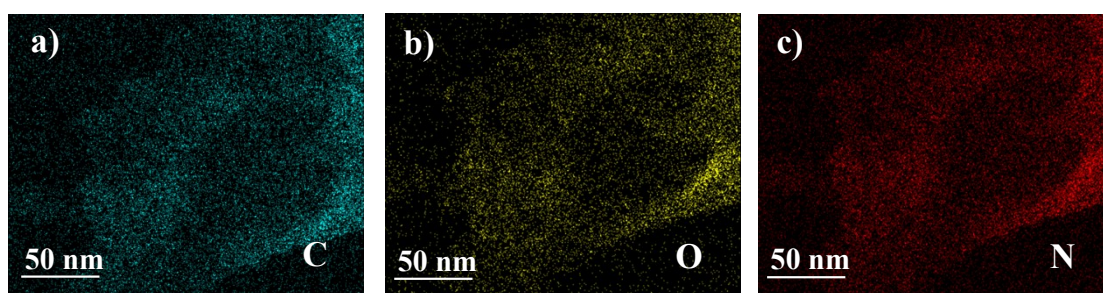

| Sample quality<br>$m_0$ (g) | Constant volume<br>$V_0$ (mL) | Test element | Test solution element concentration<br>$C_0$ (mg/L) | Dilution multiple of test solution-- f | Element concentration of original sample solution $C_1$ (mg/L) | Sample element content<br>$C_x$ (mg/kg) | Percentage of sample element content<br>W% | Molecular Weight | Molecular ratio (Base on Zn) |
|-----------------------------|-------------------------------|--------------|-----------------------------------------------------|----------------------------------------|----------------------------------------------------------------|-----------------------------------------|--------------------------------------------|------------------|------------------------------|
| 0.0268                      | 10                            | Mo           | 8.02                                                | 50                                     | 401.00                                                         | 149626.87                               | 14.9627%                                   | 96.0             | 1.0174                       |
| 0.0268                      | 10                            | Ni           | 17.56                                               | 50                                     | 878.08                                                         | 327639.93                               | 32.7640%                                   | 58.7             | 3.6435                       |
| 0.0268                      | 10                            | Zn           | 5.37                                                | 50                                     | 268.50                                                         | 100186.57                               | 10.0187%                                   | 65.4             | 1.0000                       |

**Figure S3.** Element Mapping C, N, O and ICP result of  $\text{Ni}_3\text{ZnC}_{0.7}\text{-Mo}_2\text{C-T600}$ .

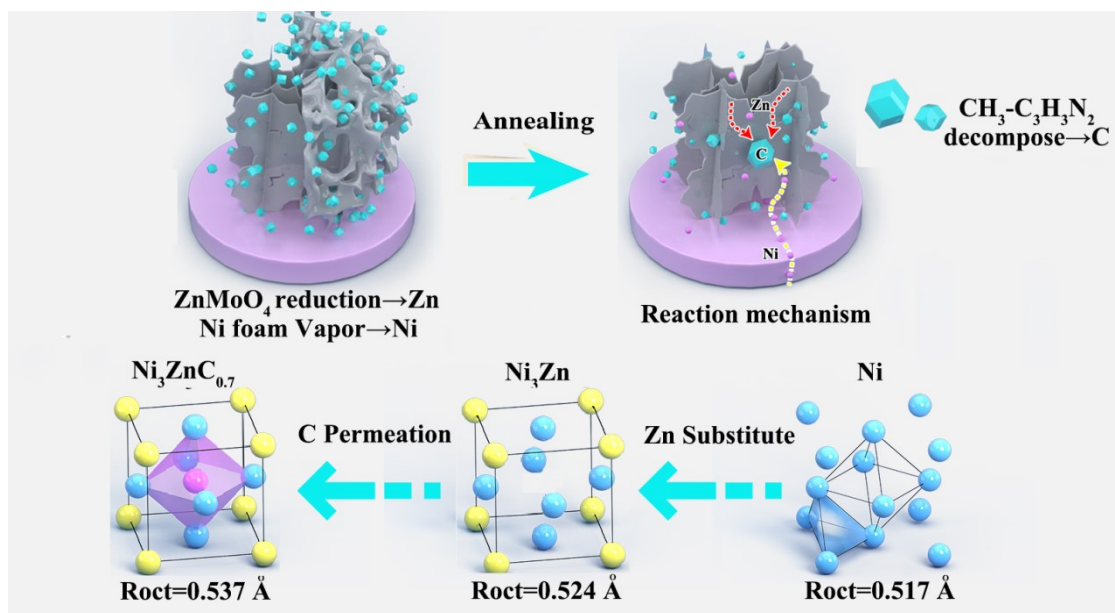

**Figure S4.** The generation details of Ni<sub>3</sub>ZnC<sub>0.7</sub> during annealing.



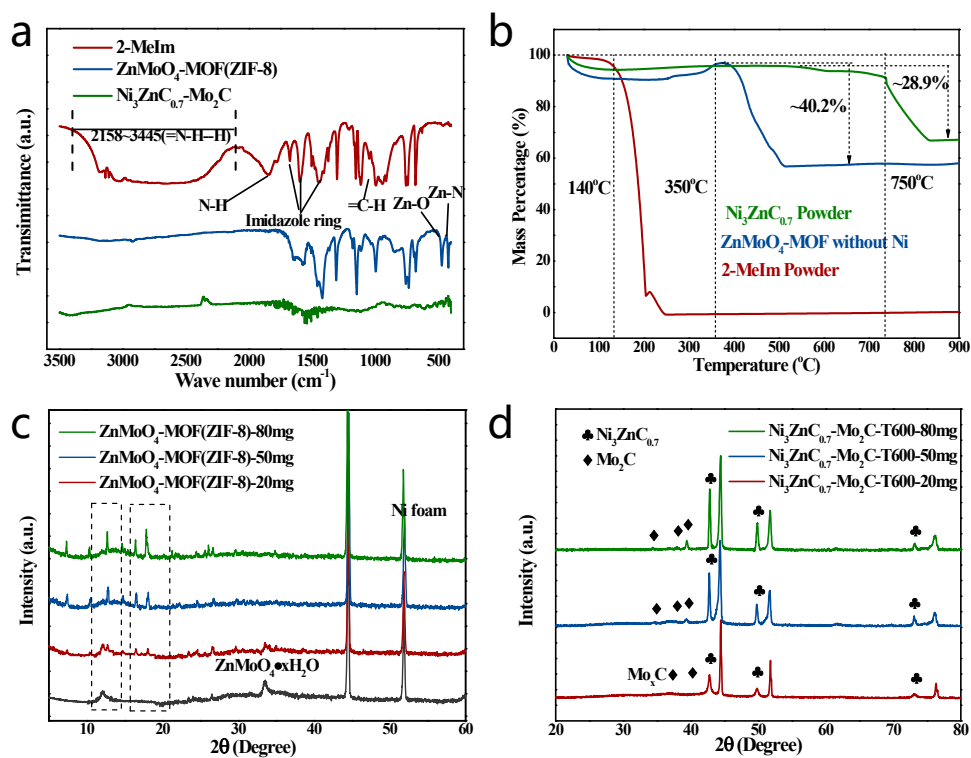

**Figure S5.** FTIR (a) and TGA (b) for 2-MeIm,  $\text{ZnMoO}_4\text{-MOF(ZIF8)}$  and  $\text{Ni}_3\text{ZnC}_{0.7}\text{-Mo}_2\text{C}$ . (c) XRD for MOF of different 2-MeIm, (d) XRD for  $\text{Ni}_3\text{ZnC}_{0.7}\text{-Mo}_2\text{C}$  of different amount of 2-MeIm.

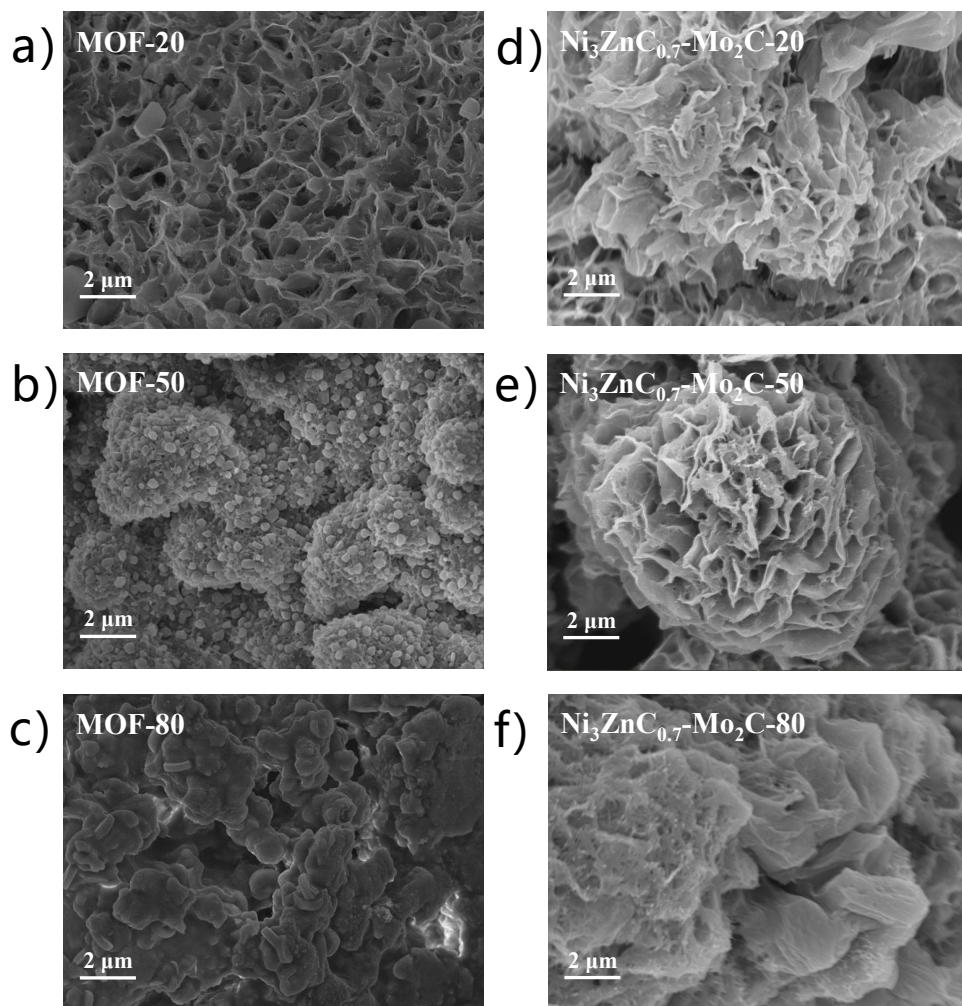

**Figure S6.** (a-c) SEM images of  $\text{ZnMoO}_4\text{-MOF(ZIF8)}$  of different amount of 2-MeIm. (d-f) SEM images of  $\text{Ni}_3\text{ZnC}_{0.7}\text{-Mo}_2\text{C}$  of different amount of 2-MeIm.

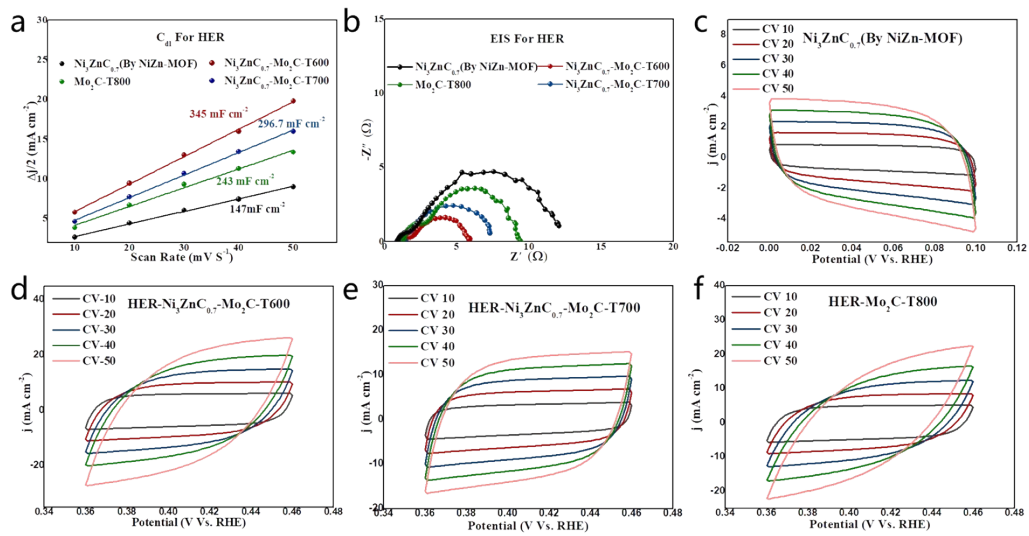

**Figure S7.** (a)  $C_{dl}$  for HER of  $Ni_3ZnC_{0.7}$ - $Mo_2C$ -T600, T700,  $Ni_3ZnC_{0.7}$  (By NiZn-MOF),  $Mo_2C$ -T800, (b) EIS for HER of  $Ni_3ZnC_{0.7}$ - $Mo_2C$ -T600, T700,  $Ni_3ZnC_{0.7}$  (By NiZn-MOF),  $Mo_2C$ -T800 (c-f) Corresponding CV curves.

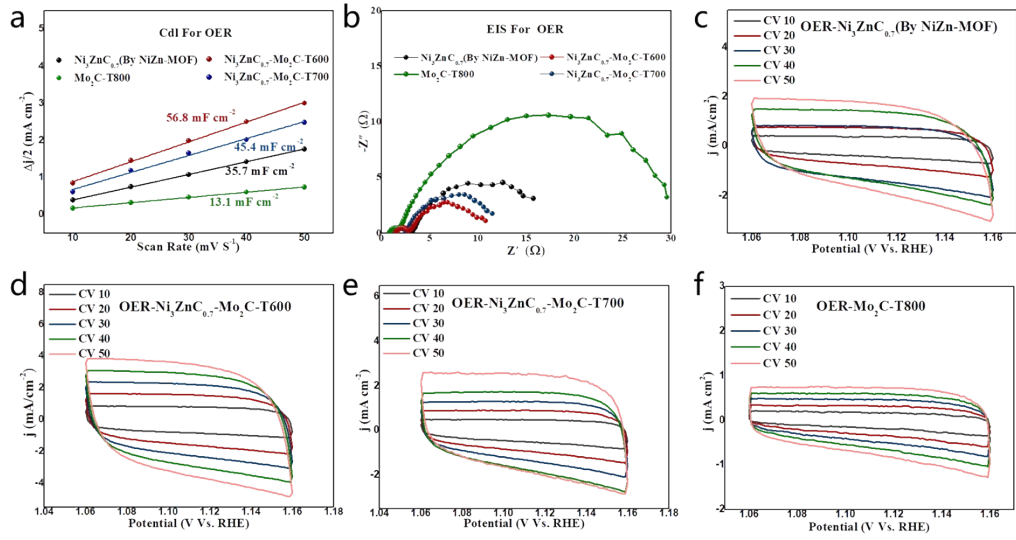

**Figure S8.** (a)  $C_{dl}$  for OER of Ni<sub>3</sub>ZnC<sub>0.7</sub>-Mo<sub>2</sub>C-T600,T700, Ni<sub>3</sub>ZnC<sub>0.7</sub> (By NiZn-MOF), Mo<sub>2</sub>C-T800, (b) EIS for OER of Ni<sub>3</sub>ZnC<sub>0.7</sub>-Mo<sub>2</sub>C-T600,T700, Ni<sub>3</sub>ZnC<sub>0.7</sub> (By NiZn-MOF), Mo<sub>2</sub>C-T800 (c-f) Corresponding CV curves.

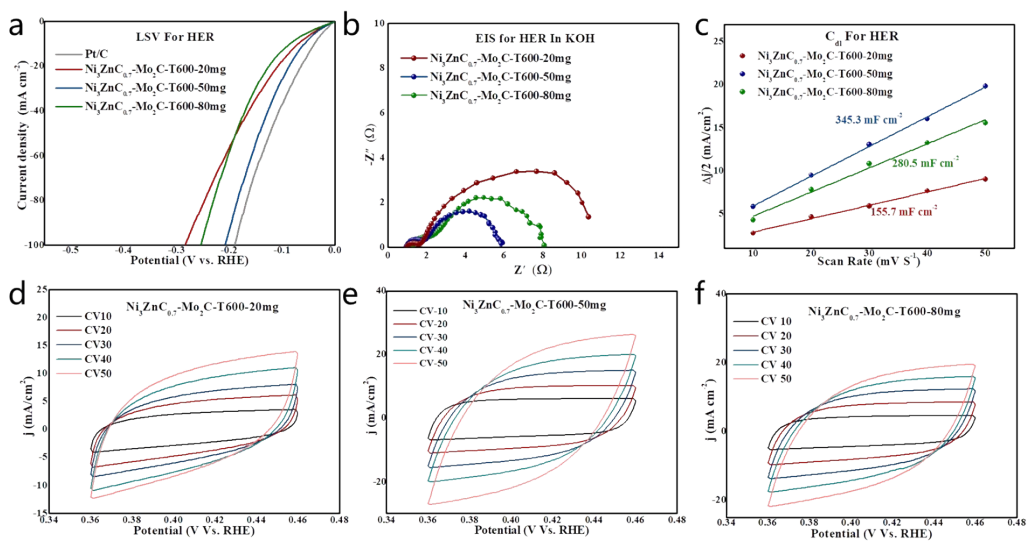

**Figure S9.** The HER contrast of  $\text{Ni}_3\text{ZnC}_{0.7}\text{-Mo}_2\text{C-T600}$ -20mg, 50mg, 80mg , (a) LSV curves (b) EIS curves (c)  $C_{dl}$  curves (d-f) corresponding CV curves.

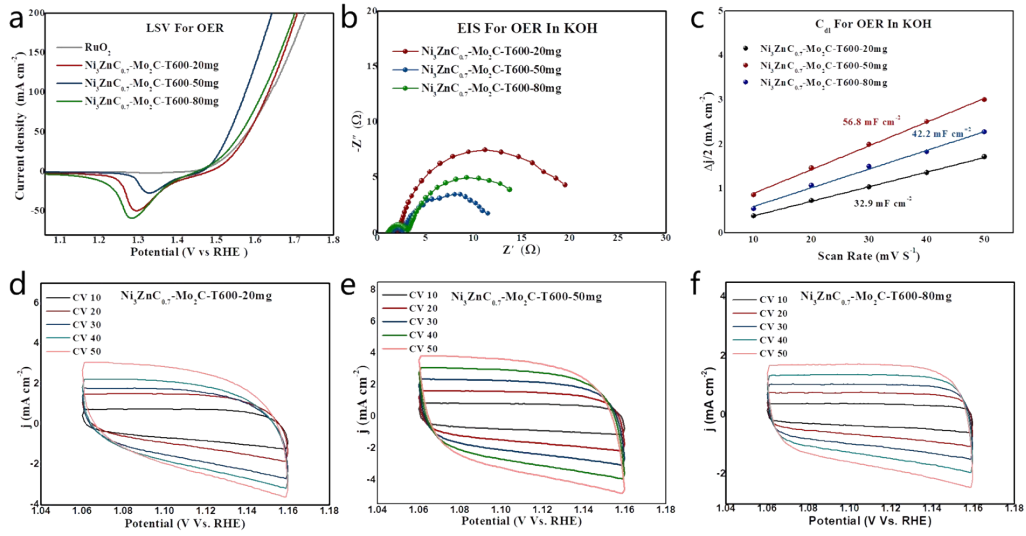

**Figure S10.** The OER contrast of  $\text{Ni}_3\text{ZnC}_{0.7}\text{-Mo}_2\text{C-T600}$ -20mg, 50mg, 80mg (a) LSV curves (b) EIS curves (c)  $C_{dl}$  curves (d-f) corresponding CV curves.

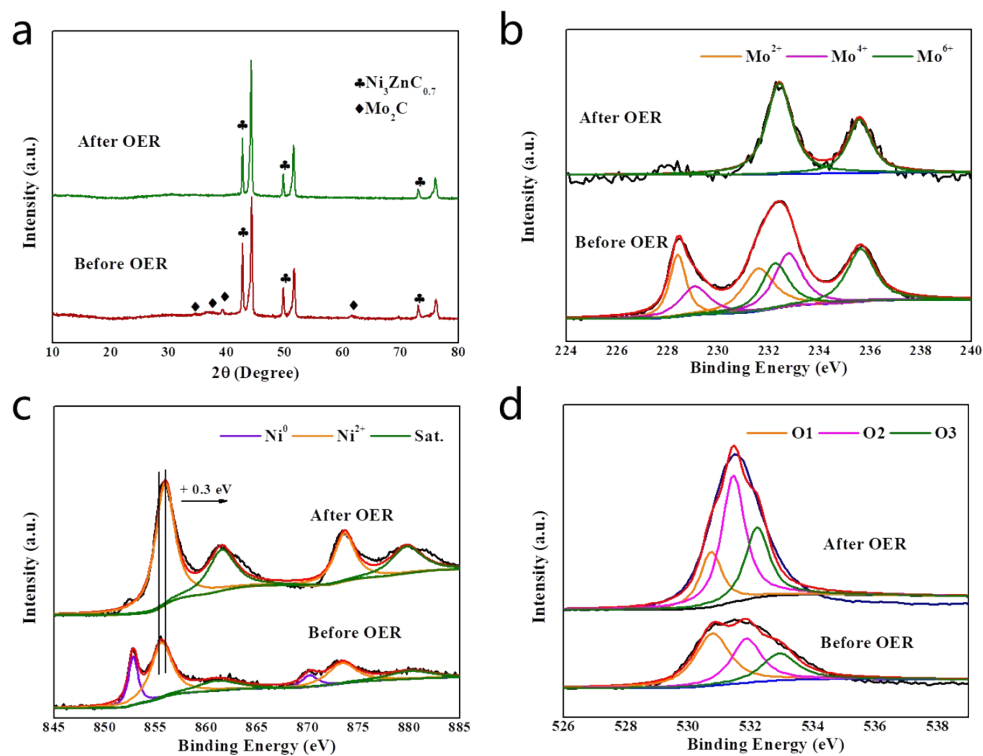

**Figure S11.** (a) XRD before and after OER of  $\text{Ni}_3\text{ZnC}_{0.7}\text{-Mo}_2\text{C-T600}$ , (b) Mo 3d before and after OER, (c) Ni 2p before and after OER, (d) O 1s before and after OER of  $\text{Ni}_3\text{ZnC}_{0.7}\text{-Mo}_2\text{C-T600}$ .

**Table S1.** The comparison of overpotential with the reported bifunctional electrocatalysts at 10 mA cm<sup>-2</sup>

| Samples                                                 | $\eta_{10}$ for<br>HER | $\eta_{10}$ for<br>OER | $\eta_{10}$ for<br>Water<br>Splitting | References       |
|---------------------------------------------------------|------------------------|------------------------|---------------------------------------|------------------|
| <b>Ni<sub>3</sub>ZnCo<sub>0.7</sub>-Mo<sub>2</sub>C</b> | <b>58 mV</b>           | <b>257 mV</b>          | <b>1.56 V</b>                         | <b>This work</b> |
| Ni <sub>3</sub> ZnCo <sub>0.7</sub>                     | 203 mV                 | 380 mV                 | 1.67V                                 | [19]             |
| Ni-Ni <sub>3</sub> C                                    | 98 mV                  | 299 mV                 | 1.64 V                                | [17]             |
| Ni-Ni <sub>3</sub> N                                    | /                      | 229 mV                 | /                                     | [27]             |
| Fe-Ni <sub>3</sub> C                                    | 178 mV                 | 275 mV                 | 1.58 V                                | [15]             |
| Co-Co <sub>2</sub> C                                    | 96 mV                  | 261 mV                 | 1.63V                                 | [32]             |
| CoP-Co <sub>2</sub> P                                   | 62.5 mV                | 280 mV                 | 1.56 V                                | [37]             |
| Co <sub>3</sub> ZnCo-Co                                 | 188 mV                 | 295 mV                 | 1.65 V                                | [38]             |
| Co <sub>6</sub> W <sub>6</sub> C                        | 161 mV                 | 310 mV                 | 1.58 V                                | [25]             |
| Co <sub>6</sub> Mo <sub>6</sub> C                       | 59 mV                  | 286 mV                 | 1.59 V                                | [39]             |
| Cu-CoWC                                                 | 98 mV                  | 238 mV                 | 1.64 V                                | [40]             |
| Ni-Mo <sub>x</sub> C                                    | 162 mV                 | 328 mV                 | 1.72 V                                | [41]             |
| Co-Mo <sub>2</sub> C                                    | 121 mV                 | 311 mV                 | 1.67 V                                | [42]             |
| NiS <sub>2</sub> -MoS <sub>2</sub>                      | 62 mV                  | 278 mV                 | 1.59 V                                | [43]             |
| CoP(Hollow)                                             | 173 mV                 | 333 mV                 | 1.65 V                                | [44]             |
